# Supplementary material for: Urbanization processes drive divergence at the major histocompatibility complex in a common waterbird
Source: PeerJ. 2021 Oct 5;9:e12264. doi: 10.7717/peerj.12264 (PMC8500109; doi:10.7717/peerj.12264)
Supplement: Supplemental Information 2 [file peerj-09-12264-s002.xlsx]

## Sheet: MHC2
Supplementary File 2. AmpliSAS results for techincal replicates, showing the number of Illumina reads per allele (after processing).
DEPTH_AMPLICON	2173	2388	817	670	1994	1869	2774	1344	1490	1439	1468	2658	1235	1599	2101	2620	1866	1805	2245	2938	2757	2814	2773	1427	2933	1280	2348	1036	3313	1710	1327	823	1531	895	2200	1280	2770	1182	1936	923	1299	1244	1916	1510	1739	1837	1632	1650	2479
DEPTH_ALLELES	1815	2108	529	463	1636	1612	2235	1084	1097	1194	1231	2335	897	1230	1769	2134	1550	1374	1863	2497	2310	2368	2179	1170	2437	1137	1810	817	2745	1389	939	589	1278	724	1882	1121	2212	1002	1595	779	1073	999	1592	1252	1377	1422	1362	1352	2097
COUNT_ALLELES	4	4	2	2	3	3	3	3	2	2	3	3	2	2	3	3	4	4	3	3	4	4	4	4	5	5	3	3	3	3	2	2	3	3	4	4	3	3	3	3	3	3	2	2	2	2	3	3	3
BIRD_ID	ID_1	ID_1	ID_2	ID_2	ID_3	ID_3	ID_4	ID_4	ID_5	ID_5	ID_6	ID_6	ID_7	ID_7	ID_8	ID_8	ID_9	ID_9	ID_10	ID_10	ID_11	ID_11	ID_12	ID_12	ID_13	ID_13	ID_14	ID_14	ID_15	ID_15	ID_16	ID_16	ID_17	ID_17	ID_18	ID_18	ID_19	ID_19	ID_20	ID_20	ID_21	ID_21	ID_22	ID_22	ID_23	ID_23	ID_24	ID_24	ID_25
MHC2-00001							784	412											680	894	658	703			475	199	603	299							445	279			594	264
MHC2-00002																	507	550					627	346					1061	575			464	258	440	279					378	327
MHC2-00003					494	518					351	709					454	473			591	706
MHC2-00004																																					758	348
MHC2-00005																																			497	268
MHC2-00006																																																	799
MHC2-00007			264	272			866	372											595	942																					377	373
MHC2-00008																													889	405
MHC2-00009	426	515																																													434	421
MHC2-00011					583	587					493	859
MHC2-00010																																																	671
MHC2-00012																																															460	498
MHC2-00014																							730	443																					812	844
MHC2-00013									516	567
MHC2-00015							585	300					408	586																													865	631
MHC2-00016													489	644
MHC2-00017															545	669											564	260
MHC2-00019																											643	258
MHC2-00018																																							535	272
MHC2-00020																			588	661																	622	301
MHC2-00022																					793	704
MHC2-00026															694	797
MHC2-00030									581	627
MHC2-00031											387	767
MHC2-00035					559	507
MHC2-00036															530	668
MHC2-00041																															520	307
MHC2-00039																																															468	433
MHC2-00034																																									318	299
MHC2-00044																																			500	295
MHC2-00048																																													565	578
MHC2-00051	787	807
MHC2-00049																																					832	353
MHC2-00054																																							466	243
MHC2-00058																													795	409
MHC2-00047																																											727	621
MHC2-00059																									494	212
MHC2-00061																	288	166			268	255
MHC2-00060																																	367	220
MHC2-00068																	301	185					250	71
MHC2-00067																							572	310
MHC2-00073																																																	627
MHC2-00074																									684	359
MHC2-00076																															419	282
MHC2-00078	421	565
MHC2-00072																									376	170
MHC2-00091																																	447	246
MHC2-00101																									408	197
MHC2-00112			265	191
MHC2-00113	181	221
[truncated: 1 more columns]
