# Supplementary material for: Urbanization processes drive divergence at the major histocompatibility complex in a common waterbird
Source: PeerJ. 2021 Oct 5;9:e12264. doi: 10.7717/peerj.12264 (PMC8500109; doi:10.7717/peerj.12264)
Supplement: Supplemental Information 3 [file peerj-09-12264-s003.xlsx]

## Sheet: RAW DATA
Individual ID	Population	No. MHC alleles	MHC Allele 1	MHC Allele 2	MHC Allele 3	MHC Allele 4	MHC Allele 5	MHC Allele 6	Tm-18 Allele 1	Tm-18 Allele 2	Tm-20 Allele 1	Tm-20 Allele 2	Tm-27 Allele 1	Tm-27 Allele 2	Tm-38 Allele 1	Tm-38 Allele 2	KiRa-10 Allele 1	KiRa-10 Allele 2	KiRa-16 Allele 1	KiRa-16 Allele 2	KiRa-8 Allele 1	KiRa-8 Allele 2	KiRa-9 Allele 1	KiRa-9 Allele 2	B106 Allele 1	B106 Allele 2	TG03002 Allele 1	TG03002 Allele 2
1	Warszawa	2	2	8					149	149	131	131	141	141	107	111	133	139	365	365	319	323	167	169	168	178	122	124
2	Warszawa	3	2	8	32				143	149	131	131	147	147	107	107	131	135	331	331	311	311	171	173	178	180	122	122
3	Warszawa	4	2	8	19	42			149	149	131	131	141	143	107	109	133	139	323	365	315	315	167	169	178	178	122	122
4	Warszawa	3	2	128	131				137	143	131	131	133	141	107	107	133	133	315	373	307	323	169	169	180	182	118	120
5	Warszawa	4	2	8	19	42			143	149	131	131	145	145	107	107	133	135	311	311	307	339	167	169	168	176	122	122
6	Warszawa	3	4	8	40				143	149	131	131	141	147	107	111	125	129	323	329	319	327	169	169	168	178	122	124
7	Warszawa	3	1	5	7				149	149	131	133	145	147	107	109	131	131	307	359	307	331	169	169	178	182	122	122
8	Warszawa	2	28	57					143	149	131	131	141	153	107	111	129	129	307	329	327	371	167	169	180	180	122	122
9	Warszawa	3	2	8	18				149	149	131	131	147	149	103	107	125	135	329	361	367	367	167	169	170	180	122	122
10	Warszawa	2	18	46					143	149	131	131	141	149	103	107	131	131	323	329	327	327	167	169	170	170	122	122
11	Warszawa	3	2	7	11				143	149	131	131	141	159	107	111	129	131	315	331	323	327	169	171	180	180	122	122
12	Warszawa	1	28						149	149	131	131	141	153	111	111	129	135	309	361	323	343	169	171	178	178	122	122
13	Warszawa	2	7	95					143	143	131	131	141	145	107	107	129	131	345	351	331	343	169	169	180	184	122	122
14	Warszawa	3	12	39	46				149	149	131	131	141	145	107	111	131	135	335	399	311	327	169	171	178	204	122	122
15	Warszawa	2	18	46					143	149	131	131	143	147	107	111	131	131	309	331	323	343	169	169	180	180	122	122
16	Warszawa	2	28	57					149	149	131	131	141	153	107	111	127	131	331	331	343	347	169	169	178	180	122	122
17	Warszawa	1	32						149	149	131	131	147	147	107	111	129	135	361	361	311	323	169	169	180	180	122	124
18	Warszawa	4	2	8	19	42			143	143	131	131	147	149	107	111	129	135	315	361	327	339	169	169	176	178	122	122
19	Warszawa	2	44	90					143	143	131	131	145	149	107	107	131	131	355	361	311	343	169	171	168	178	122	124
20	Warszawa	3	2	8	9				143	149	131	131	141	145	107	111	135	139	315	363	335	347	167	169	176	180	120	122
21	Warszawa	2	4	40					143	143	131	131	141	141	107	111	125	129	323	349	319	327	169	169	178	184	122	122
22	Warszawa	2	28	57					143	149	131	131	141	153	107	107	131	131	327	331	323	347	169	169	178	178	122	122
23	Warszawa	3	1	5	28				143	149	131	131	143	149	107	107	131	135	309	361	323	343	169	169	180	180	122	124
24	Warszawa	3	3	4	132				143	149	131	131	141	143	107	107	129	131	361	387	331	343	169	171	176	178	122	122
25	Warszawa	2	9	45					143	149	131	131	147	147	107	107	131	135	315	349	331	359	167	171	176	184	122	122
26	Warszawa	2	7	85					149	149	127	131	133	141	107	111	131	135	315	351	319	335	169	171	180	194	122	122
27	Łódź	3	1	5	15				137	143	131	131	141	147	107	107	129	137	309	333	367	371	169	171	178	180	122	122
28	Łódź	4	1	3	5	29			143	143	131	131	139	141	107	107	129	131	333	349	339	359	169	169	174	180	122	122
29	Łódź	3	4	27	52				143	149	131	131	141	141	107	111	131	131	333	333	327	359	167	169	180	188	122	124
30	Łódź	4	3	4	29	70			143	149	131	131	135	137	107	111	123	129	351	375	307	331	167	169	176	180	120	122
31	Łódź	6	1	2	5	15	20	27	137	143	131	131	145	149	107	111	129	131	323	369	319	327	169	169	178	180	122	122
32	Łódź	3	1	16	56				143	149	131	131	147	149	107	107	131	131	313	361	343	347	169	171	170	180	122	122
33	Łódź	3	1	5	7				137	143	131	131	147	149	105	107	127	137	333	349	323	359	169	169	178	178	122	122
34	Łódź	3	21	23	37				149	149	131	133	153	157	107	107	129	131	345	377	323	327	169	169	176	180	122	122
35	Łódź	2	9	16					143	149	131	131	135	141	103	107	127	135	299	315	307	343	169	171	178	180	122	122
36	Łódź	3	1	7	15				143	149	131	131	143	149	107	111	125	137	309	323	339	347	169	171	176	180	122	122
37	Łódź	4	3	4	50	62			143	149	131	131	141	141	107	107	131	137	313	325	347	355	169	169	178	180	122	122
38	Łódź	3	1	17	33				143	149	131	131	141	141	107	111	131	131	319	353	355	359	169	171	176	180	122	124
39	Łódź	3	4	27	70				137	143	131	131	141	147	107	111	131	131	333	369	327	331	169	169	178	188	122	124
40	Łódź	4	1	2	5	8			143	149	131	131	131	161	107	109	127	131	367	419	335	339	169	169	176	178	122	122
41	Łódź	3	3	61	71				143	149	131	131	143	161	107	111	125	131	329	385	335	371	169	169	176	178	122	122
42	Łódź	3	1	5	18				143	149	131	131	139	143	107	107	129	131	367	379	331	343	167	169	178	178	120	122
43	Łódź	3	1	5	10				137	143	131	131	143	147	107	111	125	131	367	389	331	331	167	169	178	182	122	122
44	Łódź	4	4	82	114	120			143	143	131	131	143	143	107	107	131	135	361	361	327	339	169	173	176	178	122	122
45	Łódź	3	1	27	54				149	149	131	131	139	149	107	107	129	131	345	379	339	343	169	169	180	188	120	122
46	Łódź	4	3	18	66				143	149	131	131	139	149	107	111	129	129	369	379	331	339	169	169	178	180	122	122
47	Łódź	3	1	20	33				143	149	131	131	141	143	111	111	129	131	323	323	319	359	167	169	176	180	122	122
48	Łódź	3	4	20	52				143	149	131	131	141	143	107	109	131	131	323	399	343	343	169	171	176	180	122	124
49	Łódź	2	53	81					143	149	131	131	141	147	107	109	125	131	315	359	335	335	169	171	174	180	122	122
50	Łódź	3	10	21	37				143	149	131	133	139	145	107	107	131	133	313	345	323	347	169	169	180	180	122	122
51	Łódź	2	23	31					143	149	131	133	133	141	107	107	131	131	349	379	311	327	169	169	174	176	122	122
52	Łódź	2	9	53					143	149	131	131	149	149	109	109	127	131	359	407	307	335	169	169	180	180	122	122
53	Łódź	3	15	21	37				143	149	131	131	145	145	107	107	133	137	309	345	323	339	169	171	180	180	122	122
54	Łódź	2	10	16					143	149	131	131	139	149	107	107	133	137	309	315	339	347	169	171	180	180	122	122
55	Łódź	3	1	25	56				143	143	127	131	143	147	107	111	129	129	309	321	319	339	169	169	172	176	122	122
56	Łódź	3	1	71	72				143	149	131	131	147	161	107	111	125	131	309	317	367	367	167	169	174	176	122	122
57	Sarnów	2	25	103					137	143	131	131	135	141	107	107	135	135	345	387	319	335	169	171	178	180	122	122
58	Sarnów	3	12	49	103				143	149	131	131	131	143	107	107	129	135	343	345	343	343	169	169	176	180	122	122
59	Sarnów	3	9	27	136				137	143	131	131	143	147	107	107	127	135	335	395	331	351	169	169	176	176	122	124
60	Sarnów	3	58	72	139				143	149	131	131	145	145	107	107	131	131	301	341	327	327	171	171	178	186	122	122
61	Sarnów	3	26	36	64				137	143	131	131	135	143	109	113	131	131	313	361	371	371	169	169	178	180	122	122
62	Sarnów	2	41	100					143	149	131	131	145	145	107	107	129	131	369	375	335	347	169	171	170	186	122	122
63	Sarnów	2	3	13					149	149	131	131	143	145	109	111	129	131	311	313	311	327	171	173	180	182	122	122
64	Sarnów	3	4	45	77				143	149	131	131	159	165	107	111	129	145	343	419	307	347	169	171	176	178	122	124
65	Sarnów	2	21	80					143	149	131	131	135	147	107	107	127	139	329	351	315	323	169	171	174	178	122	122
66	Sarnów	3	1	33	77				149	149	131	131	135	145	109	111	131	141	327	365	331	347	169	169	178	180	120	122
67	Sarnów	3	9	10	89				143	149	131	131	141	145	107	111	129	137	313	333	311	323	167	171	178	178	120	122
68	Sarnów	3	1	9	93				149	149	131	131	135	145	107	111	131	131	329	335	331	343	169	173	178	178	122	122
69	Sarnów	2	2	109					143	149	131	131	133	141	107	107	127	131	313	355	327	335	167	169	174	176	122	122
70	Sarnów	3	1	12	39				149	149	131	131	141	147	107	111	127	131	313	355	335	351	169	171	170	170	120	122
71	Sarnów	3	3	43	130				143	149	131	131	141	149	107	107	131	135	333	353	327	359	167	173	180	182	122	122
72	Sarnów	2	9	123					143	149	131	131	135	141	107	111	131	133	323	361	339	347	169	169	178	178	122	122
73	Sarnów	4	4	14	116	129			143	149	131	131	143	151	111	111	129	131	311	375	343	355	169	169	182	182	122	122
74	Sarnów	3	2	10	17				143	149	131	131	141	147	107	111	129	131	315	387	319	327	163	169	178	190	122	124
75	Sarnów	3	14	23	38				149	149	131	131	141	143	107	111	131	131	313	365	323	327	169	169	176	182	122	122
76	Sarnów	3	9	68	84				143	149	131	131	143	149	105	107	129	137	365	395	331	343	169	169	174	176	122	122
77	Sarnów	4	2	59	63	104			149	149	131	131	139	145	107	107	129	131	345	365	311	327	167	169	170	178	122	122
78	Sarnów	3	12	23	117				143	149	131	131	139	147	107	111	129	131	343	403	331	339	169	169	178	178	122	122
79	Sarnów	3	3	29	119				149	149	131	131	147	149	107	107	131	131	315	315	339	339	169	171	180	180	122	122
80	Sarnów	2	48	108					143	149	131	131	153	173	107	107	127	129	337	391	307	335	169	169	176	180	120	122
81	Sarnów	4	1	3	61	93			149	149	131	131	135	141	107	107	129	131	329	335	307	343	169	169	178	180	122	122
82	Sarnów	4	4	105	107	111			149	149	131	131	131	151	107	111	127	141	323	323	327	331	169	169	176	178	122	122
83	Sarnów	2	3	29					149	149	131	131	143	145	107	111	129	133	313	361	311	339	169	171	180	182	122	122
84	Żeromin	2	110	118					143	149	131	131	141	141	107	109	121	131	365	397	327	335	169	169	170	176	122	122
85	Żeromin	3	45	53	98				137	143	131	131	133	141	107	107	131	137	309	367	311	339	169	169	174	176	122	124
86	Żeromin	2	55	94					143	149	131	131	139	145	107	107	125	131	323	361	335	335	167	169	176	178	122	122
87	Żeromin	3	12	13	24				143	149	131	131	135	143	107	107	129	137	313	399	307	311	169	169	174	176	122	126
88	Żeromin	3	13	86	121				143	149	131	131	135	141	111	111	133	133	309	327	327	335	171	171	176	178	122	122
89	Żeromin	4	1	14	13	22			137	143	131	131	141	143	107	111	135	139	327	335	319	335	169	171	176	180	122	122
90	Żeromin	3	12	13	24				143	149	131	131	133	143	107	107	125	131	309	399	307	335	169	169	174	182	122	122
91	Żeromin	3	4	97	133				143	149	131	133	139	145	107	107	133	135	323	367	307	331	167	169	182	184	122	122
92	Żeromin	3	12	24	99				143	149	131	131	141	143	107	107	129	135	337	341	331	335	171	171	170	180	122	122
93	Żeromin	4	12	82	87	126			143	149	131	131	145	147	107	107	131	139	341	383	307	343	169	169	174	180	122	126
94	Żeromin	3	26	64	69				143	149	131	131	133	143	107	111	135	137	315	315	307	323	163	171	184	192	122	122
95	Żeromin	3	3	29	141				143	149	131	133	135	143	111	111	125	135	317	367	327	347	169	169	178	188	122	124
96	Żeromin	3	15	55	95				137	143	131	131	143	147	107	111	127	131	365	365	327	343	169	171	178	180	120	122
97	Żeromin	5	1	2	3	8	15		143	143	131	131	135	145	111	111	129	129	309	309	331	335	169	169	174	176	122	122
98	Żeromin	3	2	25	68				143	149	131	133	149	159	111	111	127	131	393	393	311	339	167	171	176	176	122	122
99	Żeromin	2	30	55					143	149	131	131	141	141	111	111	135	137	309	335	319	323	169	169	176	184	122	122
100	Żeromin	3	1	18	115				143	149	131	131	141	149	107	111	129	131	309	367	307	327	167	169	180	190	122	122
101	Żeromin	2	76	124					149	149	131	131	145	145	107	107	131	133	309	329	315	343	169	171	178	184	120	124
102	Żeromin	4	65	75	96	137			149	149	131	131	135	141	107	111	131	137	335	347	323	331	169	171	178	180	122	122
103	Żeromin	3	1	22	50				137	143	131	131	133	147	109	111	131	139	315	377	311	355	169	169	178	180	122	122
